# Supplementary material for: Nitrogen Metabolism during Anaerobic Fermentation of Actual Food Waste under Different pH Conditions
Source: MDPI journal article supplement (doi:10.3390/fermentation10030129), 2024-02-25

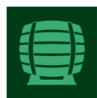

# Nitrogen Metabolism during Anaerobic Fermentation of Actual Food Waste under Different pH Conditions

Chuyun Zhao <sup>1,†</sup>, Luxin Yang <sup>1,†</sup>, Huan Li <sup>1,\*</sup> and Zhou Deng <sup>2</sup>

<sup>1</sup> Shenzhen International Graduate School, Tsinghua University, Shenzhen 518055, China; 18817295185@163.com (C.Z.); ylx\_hz@163.com (L.Y.)

<sup>2</sup> Shenzhen Lisai Environmental Technology Co., Ltd., Shenzhen 518055, China; dengzhou2005@126.com

\* Correspondence: li.huan@sz.tsinghua.edu.cn

† These authors contributed equally to this work.

## Supplementary material

### 1. Metagenomic analyses

#### 1.1. Sequencing data processing

The raw data processing using Trimmomatic (v.0.36): <http://www.usadel-lab.org/cms/index.php?page=trimmomatic> was conducted to acquire the clean data for subsequent analysis.

#### 1.2. Metagenome Assembly

MEGAHIT (Version v1.0.6): <https://github.com/voutcn/megahit> could be used to assemble the clean data. Filter the fragment shorter than 500 bp in all of Scaffolds for statistical analysis.

#### 1.3. Binning

Contigs obtained from the metagenomic assembly are filtered based on length. Subsequently, the filtered contigs are used for binning assembly using MetaBAT (version 2.12.1). MetaBAT employ nucleotide composition and abundance (NCA) to calculate distance matrices for the binning assembly of contigs, producing bins that are used for reconstructing draft microbial genomes from environmental samples. For quality assessment of the obtained bins, the CheckM software (version not specified) is used. The working principle of CheckM involves the identification of marker genes in the bin sequences via Hidden Markov Models (HMM). These are then aligned with universal single-copy genes using HMMER (version 3.1.2). The bins are placed into a reference phylogenetic tree using pplacer, and a specific lineage marker set is determined for quality assessment of the bins. Species annotation for the bins is carried out using the AMPHORA2 software.

#### 1.4. Gene prediction, taxonomy, and functional annotation

Open reading frames (ORFs) from each assembled contig were predicted using Prodigal/MetaGene (<http://metagene.cb.k.u-tokyo.ac.jp/>). The predicted ORFs with a length  $\geq$  100 bp were retrieved and translated into amino acid sequences using the NCBI translation table (<http://www.ncbi.nlm.nih.gov/Taxonomy/taxonomyhome.html/index.cgi?chapter=tgencodes#SG1>).

A non-redundant gene catalog was constructed using CD-HIT (<http://www.bioinformatics.org/cd-hit/>, version 4.6.1) with 90% sequence identity and 90% coverage. High-quality reads were aligned to the non-redundant gene catalogs to calculate gene abundance with 95% identity using SOAPaligner (<http://soap.genomics.org.cn/>, version 2.21).

Representative sequences of non-redundant gene catalog were aligned to NR database with an e-value cutoff of  $1e-5$  using Diamond (<http://www.diamondsearch.org/index.php>, version 0.8.35) for taxonomic annotations. The KEGG annotation was conducted using Diamond (<http://www.diamondsearch.org/index.php>, version 0.8.35) against the Kyoto Encyclopedia of Genes and Genomes database (<http://www.genome.jp/kegg/>) with an e-value cutoff of  $1e-5$ .

## 2. Metatranscriptomic analyses

### 2.1. Quality control

The raw data of fastq format was processed by Trimmomatic (v.0.36) <http://www.usadellab.org/cms/index.php?page=trimmomatic> to acquire the clean data. Clean data were mapping to NCBI Rfam databases, to remove the rRNA sequences by Bowtie2 (v2.33) <https://github.com/BenLangmead/bowtie2>.

### 2.2. De novo assembly

The remaining mRNA sequences were de novo assembled, which using the data by splicing software Trinity (v2.4.0) <https://github.com/trinityrnaseq/trinityrnaseq>.

### 2.3. Quantification of gene expression level

Clean data was mapped back onto the assembled transcriptome by bowtie2 (v2.33) <https://github.com/BenLangmead/bowtie2>. Read count of each gene in each sample was obtained from the mapping results by corset (v1.06) <https://github.com/Oshlack/Corset>. In order to make the expression level of genes comparable among different genes and different experiments, the RPKM of each gene was calculated.

### 2.4. Annotation

The Unigenes were blasted to the sequences of different database by BLASTx <http://blast.ncbi.nlm.nih.gov/Blast.cgi> to obtain the species annotation results (e-value  $< 1e-5$ ). The sum of the RPKM of all genes belonging to a species was taken as the abundance of the species. At each taxonomic level, the abundance of species in each sample was counted to construct an expression abundance profile at the corresponding taxonomic level. The corresponding functional annotation and abundance statistics were obtained based on KEGG database (<http://www.kegg.jp/kegg/>),

## 3. Supplementary figures

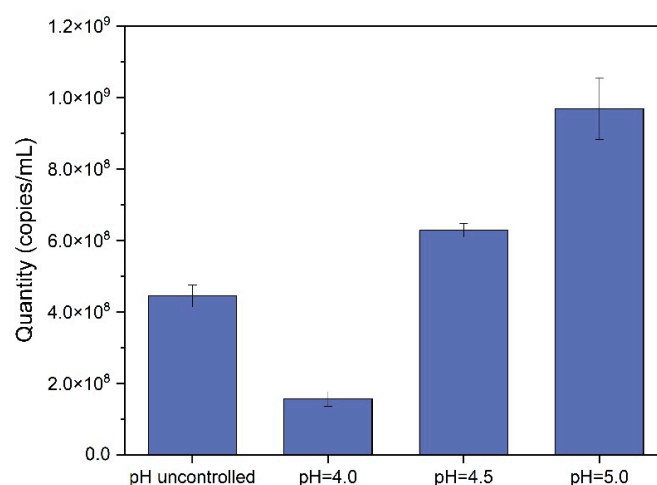

**Figure S1.** Quantities of bacteria in reactors using qPCR.

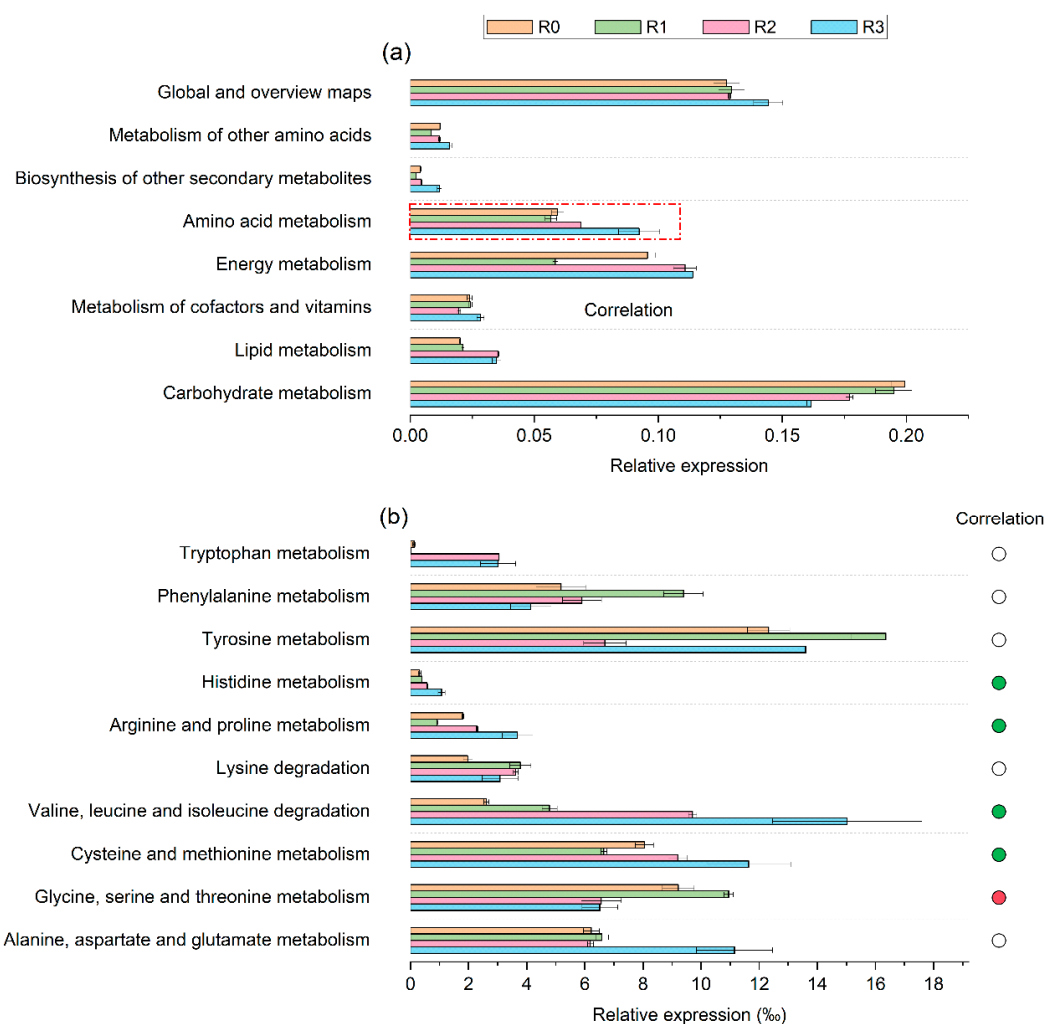

**Figure S2.** Relative gene expression of representative KEGG functional categories (a. metabolism at secondary level; b. key enzymes involving amino acid metabolism; Green pellets indicate positive correlation between expression level and pH, implying the Spearman's correlation coefficient  $R2 > 0.7$  and  $P < 0.01$ , and the red pellets indicate negative correlation).

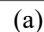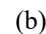

Supplement: s1 [file s1]
